# Supplementary material
Source: MDPI journal article supplement (https://www.mdpi.com/2073-4433/10/11/712)
Supplement: s1 [file s1]

Seasonal changes of Hamon Evapotranspiration under 1.5 and 2.0 degree warming

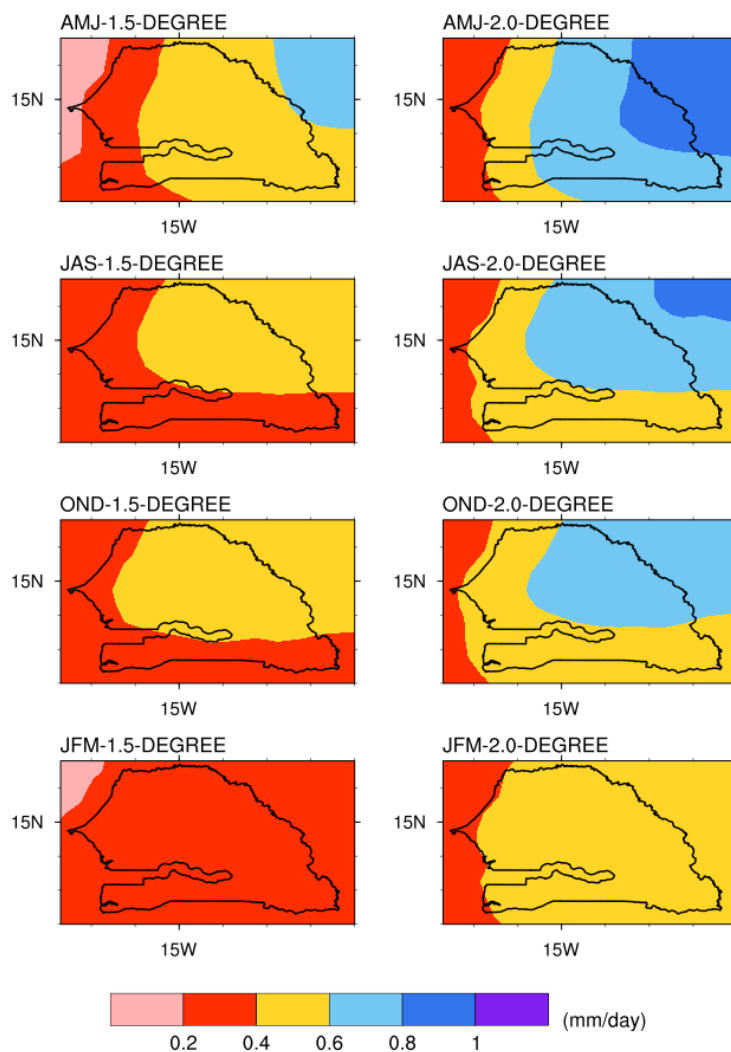

**Figure S1:** Seasonal Hamon Evapotranspiration changes (first row: April-May-June [AMJ], second row: July-August-September [JAS], third row: October-November-December [OND], fourth row: January-February-March [JFM]) under 1.5°C (left column) and 2°C (right column) GWLs

Seasonal changes of Hargreaves Evapotranspiration under 1.5 and 2.0 degree warming

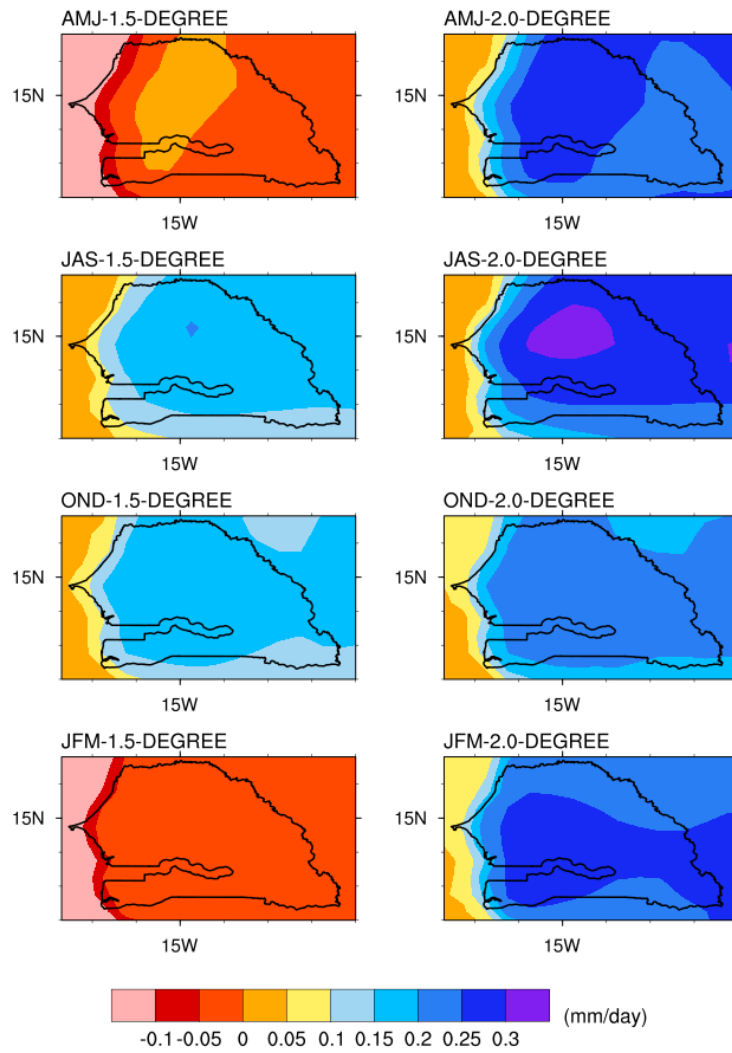

**Figure S2:** Seasonal Hargreaves Evapotranspiration changes (first row: April-May-June [AMJ], second row: July-August-September [JAS], third row: October-November-December [OND], fourth row: January-February-March [JFM]) under 1.5°C (left column) and 2°C (right column) GWLs

Seasonal changes of penman Evapotranspiration under 1.5 and 2.0 degree warming

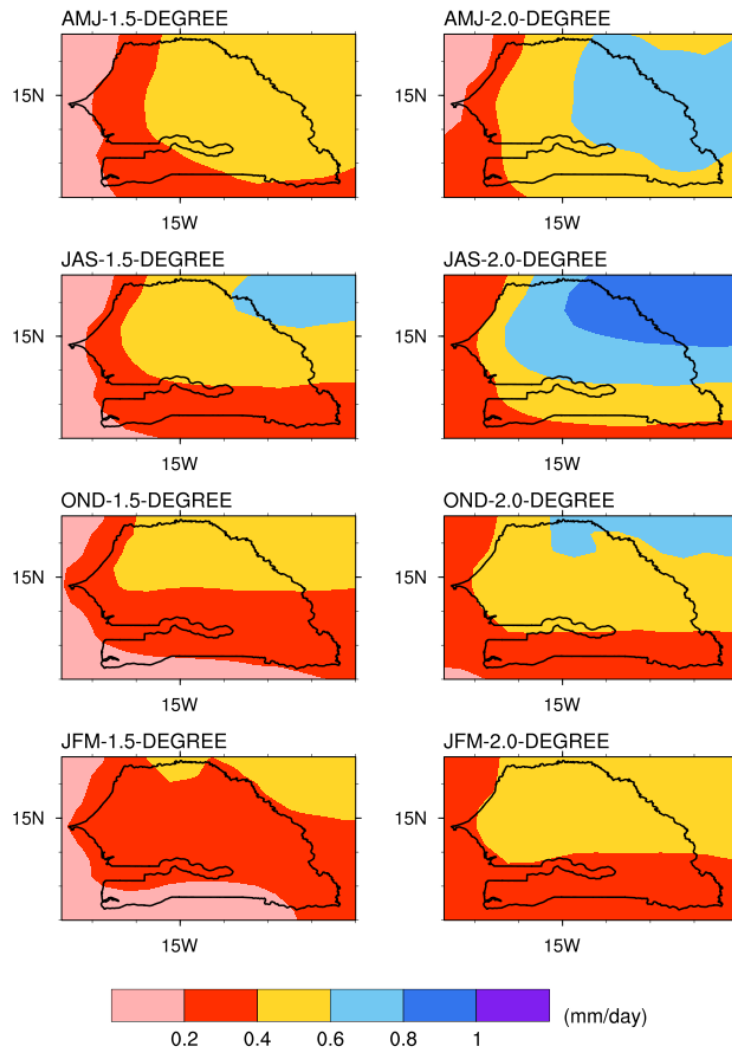

**Figure S3:** Seasonal Penman Evapotranspiration changes (first row: April-May-June [AMJ], second row: July-August-September [JAS], third row: October-November-December [OND], fourth row: January-February-March [JFM]) under 1.5°C (left column) and 2°C (right column) GWLs.

AMJ Pr minus ET changes under 1.5 and 2.0 degree warming

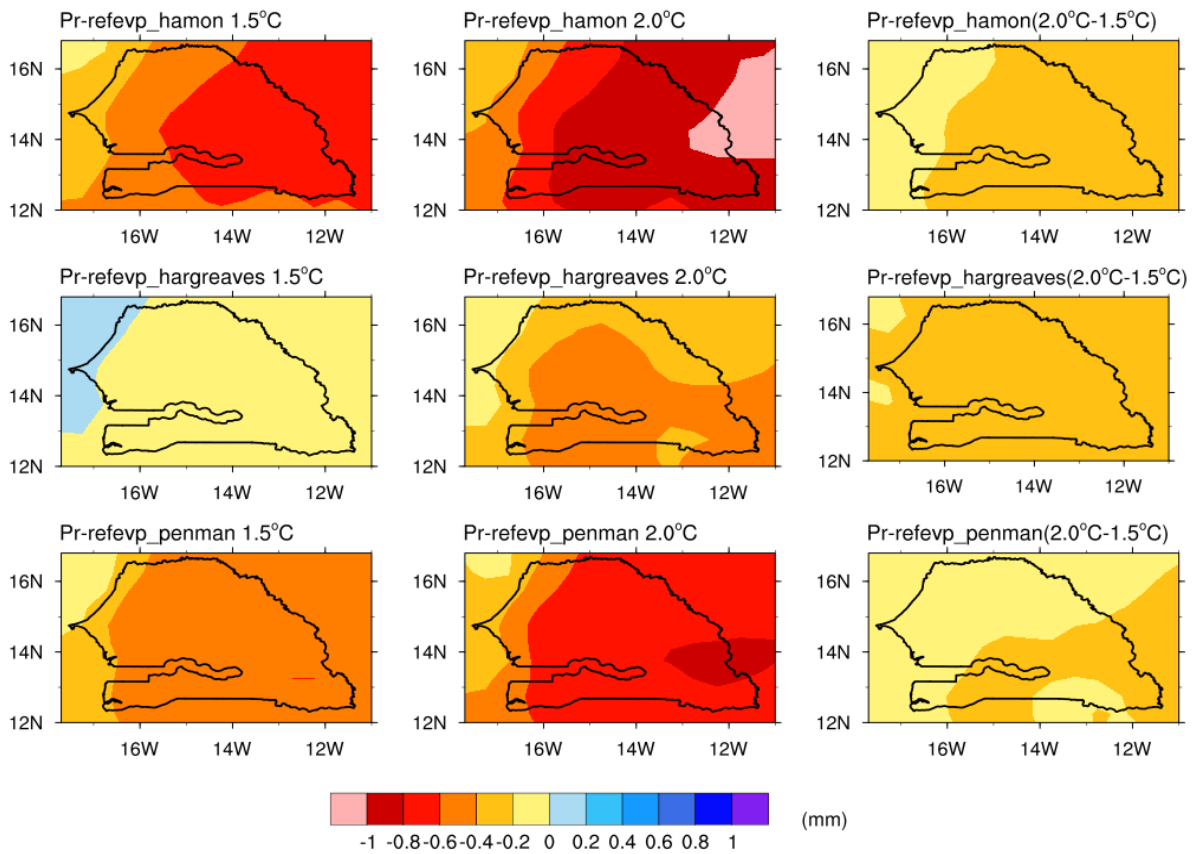

**Figure S4:** Seasonal water balance (Pr-ET, first row: Hamon, second row: Hargreaves, third row: Penman) changes under 1.5°C (left column) and 2°C (middle column) GWLs, and The column on the right provides the difference between 2.0°C and 1.5°C GWLs

JFM Pr minus ET changes under 1.5 and 2.0 degree warming

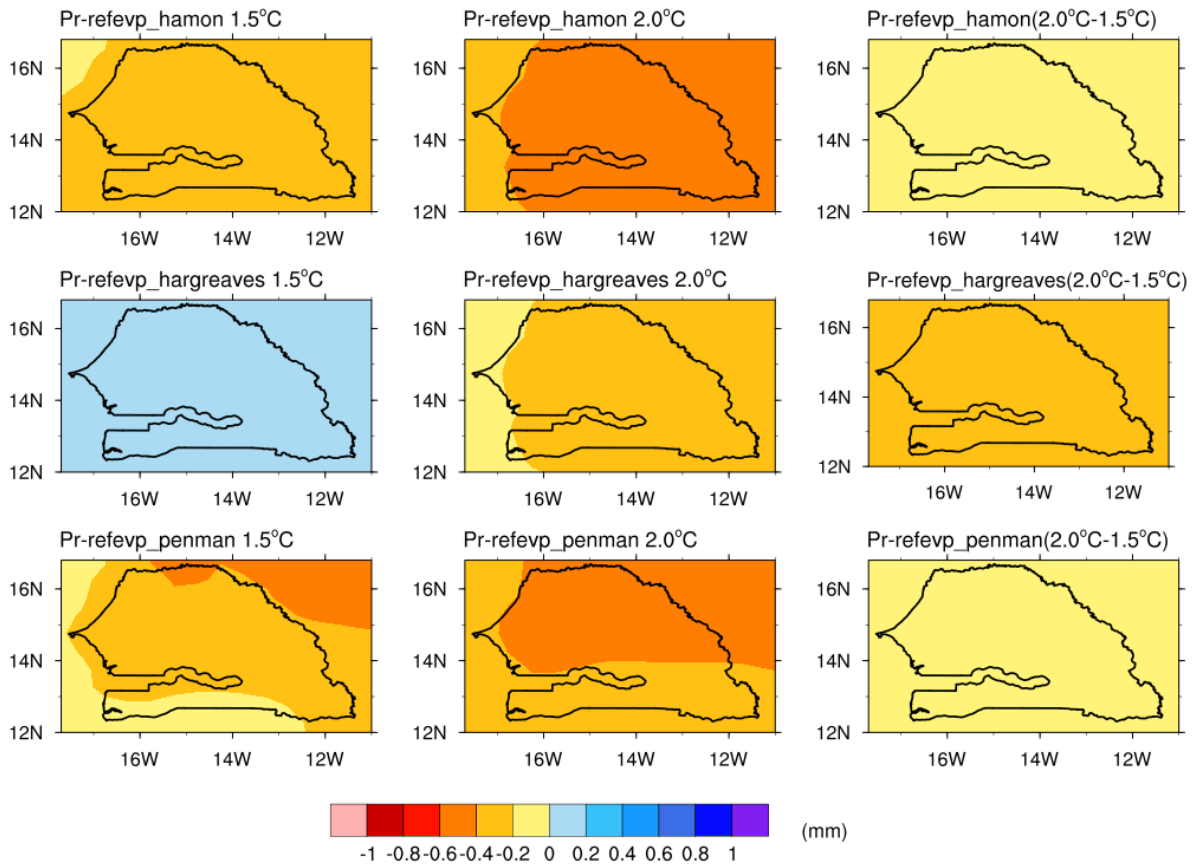

**Figure S5:** Seasonal water balance (Pr-ET, first row: Hamon, second row: Hargreaves, third row: Penman) changes under 1.5°C (left column) and 2°C (middle column) GWLs, and The column on the right provides the difference between 2.0°C and 1.5°C GWLs

OND Pr minus ET changes under 1.5 and 2.0 degree warming

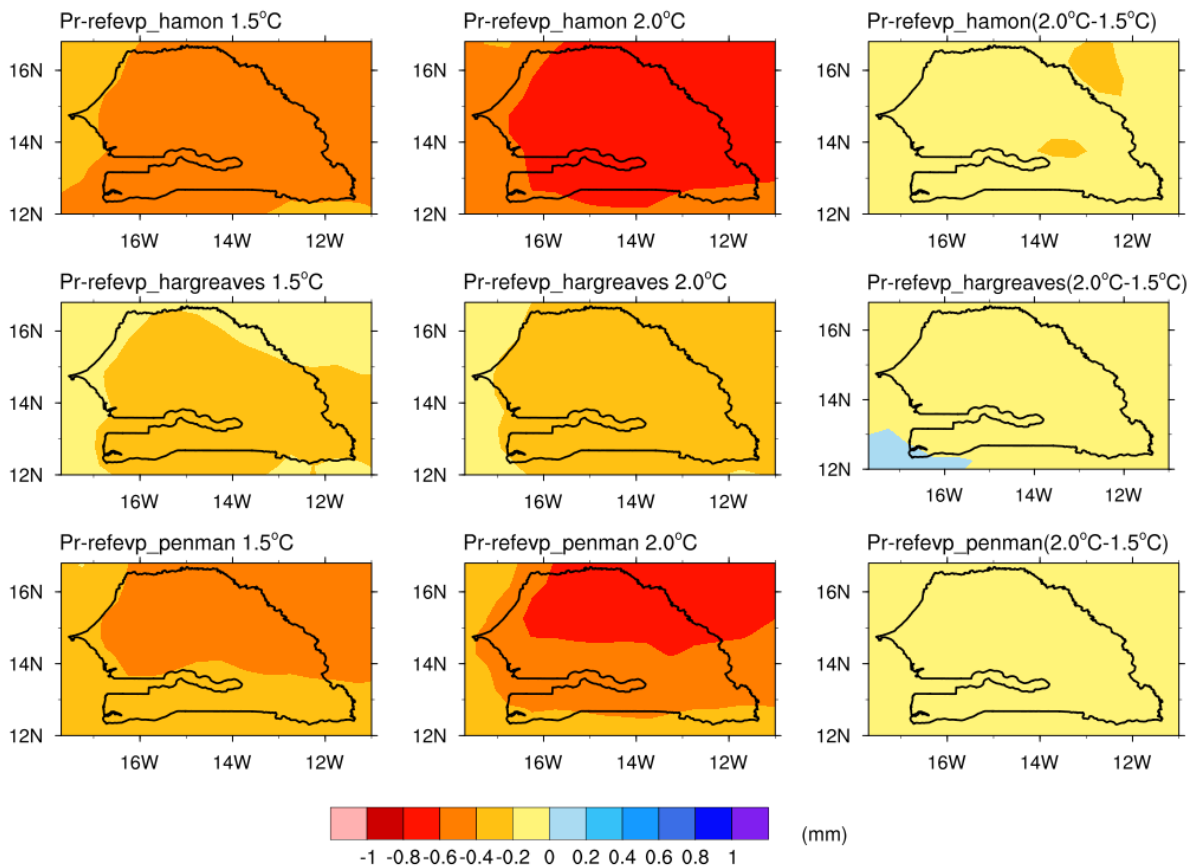

**Figure S6:** Seasonal water balance (Pr-ET, first row: Hamon, second row: Hargreaves, third row: Penman) changes under 1.5°C (left column) and 2°C (middle column) GWLs, and The column on the right provides the difference between 2.0°C and 1.5°C GWLs
